# Supplementary material
Source: PubMed Central journal article supplement (PMC2857005)

## SUPPLEMENTAL FIGURE LEGENDS

**Supplemental Figure 1. Impact of alanine substitution of G338 and G342 on 5-HT uptake.** hSERT C109A, C109A/G338A and C109A/G342A mutant cDNAs were transiently transfected in HEK-293T cells at equal concentrations and assayed for uptake at a single  $^3\text{H}$ -5-HT concentration (see Experimental Procedures). Results represent the means  $\pm$  SEM from three experiments. Means of mutant uptake were compared with C109A using a two-way t-test, with  $p < 0.001$  indicating significance. \*,  $p < 0.001$  compared with C109A.

**Supplemental Figure 2. Impact of MTSET and MDMA on hSERT C109A/I333C.** hSERT C109A/I333C mutant cDNA was transiently transfected in HEK-293T cells at equal concentrations and assayed for uptake at a single  $^3\text{H}$ -5-HT concentration following pretreatment with 10 mM MTSET, 50  $\mu\text{M}$  MDMA, or both MTSET and MDMA (see Experimental Procedures). Results represent the means  $\pm$  SEM from three experiments and normalized to untreated C109A/I333C expressing cells. Means of mutant uptake were compared using a one-way ANOVA. \*,  $P < 0.05$ ; \*\*,  $P < 0.001$

Supplemental Figure 1.

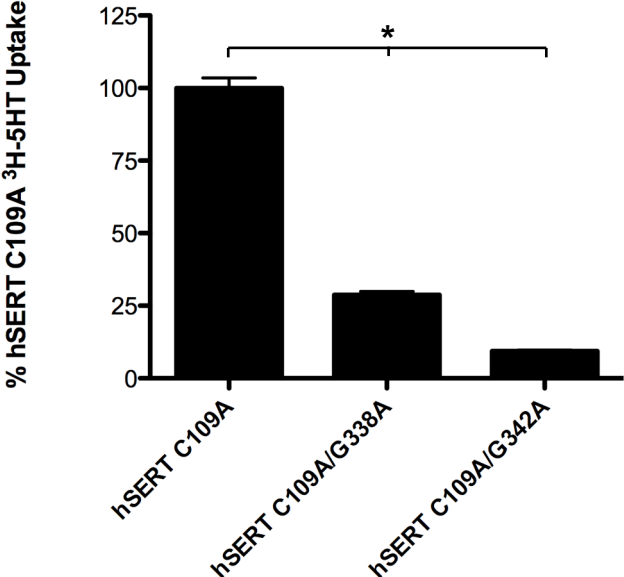

Supplemental Figure 2.

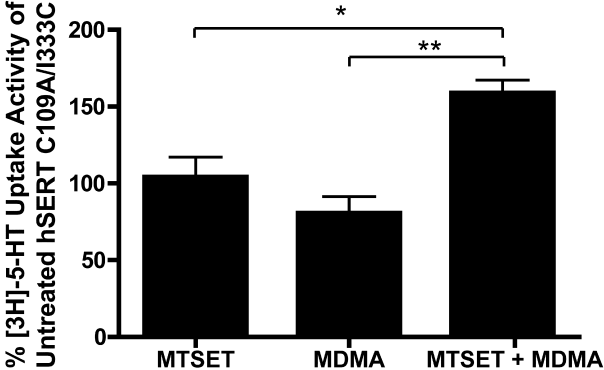

Supplement: supp_M109.093658_jbc.M109.093658-1.pdf [file supp_M109.093658_jbc.M109.093658-1.pdf]
